# Supplementary material
Source: PubMed Central journal article supplement (PMC3498915)

# Supplementary Figure 1

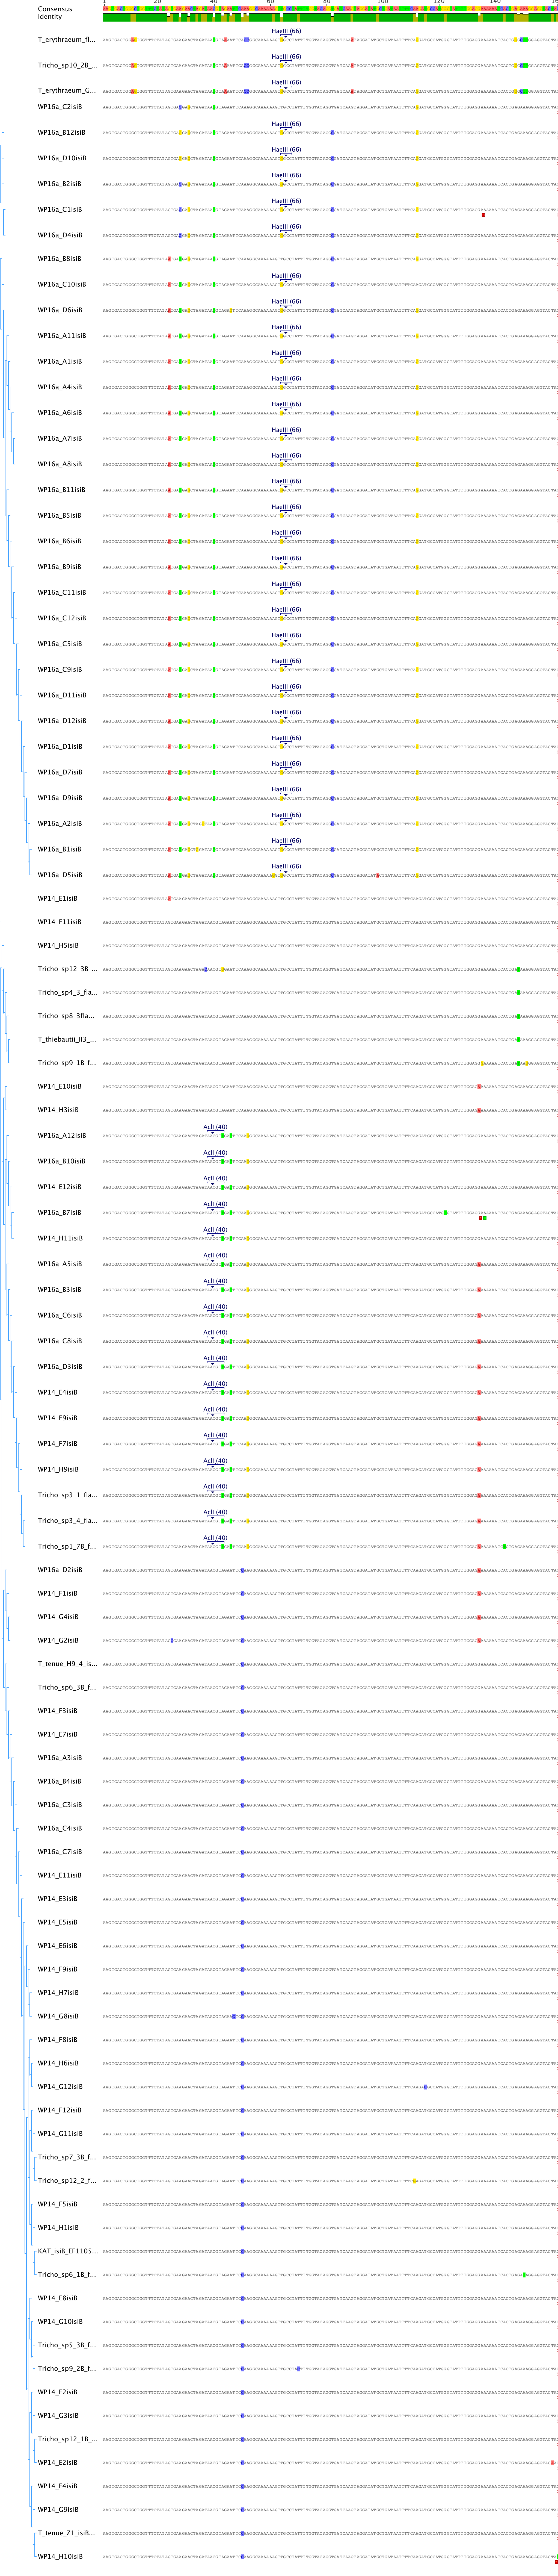

Supplement: ismej201213x2.pdf [file ismej201213x2.pdf]
